# Supplementary figures and images for: Large-scale and fast synthesis of nano-hydroxyapatite powder by a microwave-hydrothermal method
Source: Royal Society of Chemistry journal article supplement (doi:10.1039/c9ra00091g), 2019-01-01

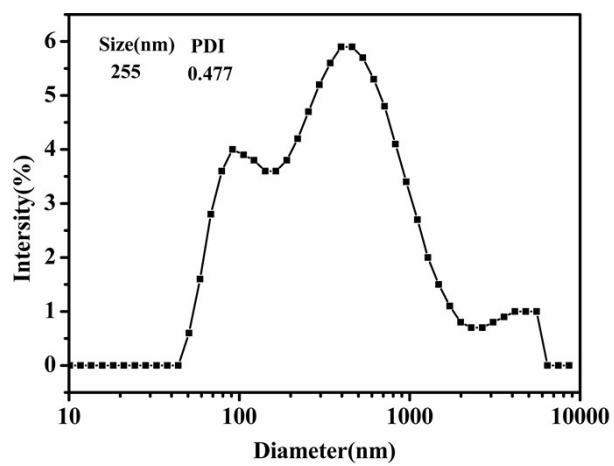

Fig. S1. Size distribution of samples with 0.5mol/L  $\text{Na}_2\text{HPO}_4$

Supplement: c9ra00091g1.pdf [file c9ra00091g1.pdf]
